# Supplementary material for: Protocol for process evaluation of a randomised controlled trial of family-led rehabilitation post stroke (ATTEND) in India
Source: PubMed Central journal article supplement — BMJ Open. 2016 Sep 15;6(9):e012027. doi: 10.1136/bmjopen-2016-012027 (PMC5030603; doi:10.1136/bmjopen-2016-012027), 2016-09-15
Supplement: bmjopen-2016-012027supp1.pdf [file bmjopen-2016-012027supp1.pdf]

**Additional File 1: Template for observations and documentary analysis**

Name of researcher:

Date and length of time of observations:

Location/s at which the observations were carried out:

| Hospital:                                                                                                                                                                                                                                            | Description | Comments |
|------------------------------------------------------------------------------------------------------------------------------------------------------------------------------------------------------------------------------------------------------|-------------|----------|
| <b>Trial Set up</b> (may be in site feasibility documentation and can be asked of the SC)                                                                                                                                                            |             |          |
| Recruitment of the site                                                                                                                                                                                                                              |             |          |
| Demographics, patient load that the hospital serves (may be in the site feasibility documentation)                                                                                                                                                   |             |          |
| Average cost of inpatient care per day- funding, such as out of pocket etc., costs of a physiotherapists visit in usual care.                                                                                                                        |             |          |
| Size of hospital                                                                                                                                                                                                                                     |             |          |
| Description of the stroke unit and organisation of care, work load                                                                                                                                                                                   |             |          |
| Use of any policies, guidelines, tools (e.g. patient information sheets) for stroke management                                                                                                                                                       |             |          |
| Usual routine activities e.g. frequency of MDT meetings, number of physiotherapists meetings with the patients and families, working environment                                                                                                     |             |          |
| Role of the SC in the unit, participation in the daily activities, role in recruitment of patients, informed consent process.                                                                                                                        |             |          |
| Trial implementation                                                                                                                                                                                                                                 |             |          |
| * Observations of patients (usual care) stay in the unit<br>-if patient is enrolled into trial, provide the ID.<br>- number of ward rounds, presence of family, care provided by the stroke team e.g. education, or wound management etc., discharge |             |          |

|                                                                                                                                                                                                                                                                                                                                                                                                                                          |  |  |
|------------------------------------------------------------------------------------------------------------------------------------------------------------------------------------------------------------------------------------------------------------------------------------------------------------------------------------------------------------------------------------------------------------------------------------------|--|--|
| planning, communication with carers/ family members                                                                                                                                                                                                                                                                                                                                                                                      |  |  |
| * Observation of patients' (intervention) stay in the unit<br>-if patient is enrolled into the trial, provide ID.<br>-number of days in hospital, number of ward rounds, presence of family, care provided by the stroke team, communication with carers/ family members<br>-Interactions with the SC. What is done? What components of the intervention are delivered and what do you observe are the reactions of the patients/carers? |  |  |
| <b>*Is there any chance of contamination?</b>                                                                                                                                                                                                                                                                                                                                                                                            |  |  |
| Documentary analysis (by the monitors)<br>For a sample of patients in usual care/ intervention arm:<br><br>days admitted, PTs visits, communication with family, discharge plan: what it covers                                                                                                                                                                                                                                          |  |  |
| <b>Trial Impact</b>                                                                                                                                                                                                                                                                                                                                                                                                                      |  |  |
| Effectiveness- analysis of the unblinding forms.                                                                                                                                                                                                                                                                                                                                                                                         |  |  |
| Open field notes                                                                                                                                                                                                                                                                                                                                                                                                                         |  |  |
| Memo<br>*Researchers' overall reflections and impression of the site; and recommended plan of action if needed?<br><br>E.g. if there is un-blinding, or if there is contamination.                                                                                                                                                                                                                                                       |  |  |
