# Supplementary material for: Protocol for process evaluation of a randomised controlled trial of family-led rehabilitation post stroke (ATTEND) in India
Source: PubMed Central journal article supplement — BMJ Open. 2016 Sep 15;6(9):e012027. doi: 10.1136/bmjopen-2016-012027 (PMC5030603; doi:10.1136/bmjopen-2016-012027), 2016-09-15
Supplement: bmjopen-2016-012027supp3.pdf [file bmjopen-2016-012027supp3.pdf]

### Additional File 3: The ATTEND Study- Carer interview guide

Purpose of the interview: *Capture what it is like for carers to manage patients post stroke. How the burden could be made easier/better/worse. How the intervention package might influence this (or not); or how the trial might influence this (or not).*

| Area of Interest                                           | Initial Broad Descriptive Questions                                                                                                  | Possible Probing Questions<br>(These are a guide only. Depending on what the carer tells you, you do not have to ask all these questions or use the words exactly as written.)                                                                                                                                                                                                                                                                                                                                                                               |
|------------------------------------------------------------|--------------------------------------------------------------------------------------------------------------------------------------|--------------------------------------------------------------------------------------------------------------------------------------------------------------------------------------------------------------------------------------------------------------------------------------------------------------------------------------------------------------------------------------------------------------------------------------------------------------------------------------------------------------------------------------------------------------|
| <b>Health care experience</b>                              | <p>Can you tell me about experience in caring for your family member?</p> <p>How did you find the care in the hospital?</p>          | <ul style="list-style-type: none"> <li>- What type of support do you get from family, community or social groups with looking after your family member's health?</li> <li>- What other roles/responsibilities do you have in your family? How do you balance this with caring for your family member post stroke?</li> </ul>                                                                                                                                                                                                                                 |
| <b>Satisfaction/problems with the intervention package</b> | <p>What are your thoughts about the treatment for helping your family member post stroke?</p> <p>What has been the most helpful?</p> | <ul style="list-style-type: none"> <li>- What did you think of the hospital visit, the home visits? (if in the intervention arm)</li> <li>- What was helpful? ( eg. stroke recovery trajectory, how to identify low mood, importance of specific activities)</li> <li>- What was not helpful?</li> <li>- Would you be happy to recommend this type of care to someone else, if applicable.</li> <li>- How can the doctor or the stroke unit improve their care?</li> <li>- What has been most important in helping your family member get better?</li> </ul> |

|                                                                       |                                                                                                                                                                                                                                     |                                                                                                                                                                                                                                                                                                                                                                                                                                                                                                                                                                                                                                                                                                                                                                                                                                                                                                                                                                                                                                                                                          |
|-----------------------------------------------------------------------|-------------------------------------------------------------------------------------------------------------------------------------------------------------------------------------------------------------------------------------|------------------------------------------------------------------------------------------------------------------------------------------------------------------------------------------------------------------------------------------------------------------------------------------------------------------------------------------------------------------------------------------------------------------------------------------------------------------------------------------------------------------------------------------------------------------------------------------------------------------------------------------------------------------------------------------------------------------------------------------------------------------------------------------------------------------------------------------------------------------------------------------------------------------------------------------------------------------------------------------------------------------------------------------------------------------------------------------|
| <p><b>Asking about specific components if not already covered</b></p> | <p>Information about stroke trajectory, risk, identification of low mood</p> <p>Goal setting</p> <p>Positioning, transfers and mobility</p> <p>Task oriented training, the use of the cultural manual</p> <p>Discharge planning</p> | <ul style="list-style-type: none"> <li>- How do you know what you know about stroke? Is it from family, SC, doctor.</li> <li>- How was it trying to help your family member achieve goals that were set? <ul style="list-style-type: none"> <li>o What are the things that helped? And what things didn't?</li> </ul> </li> <li>- How was it to do the training and to maintain mobility etc? <ul style="list-style-type: none"> <li>o What are the things that might make your stop helping your family member? (pain?, tiredness, low mood, others helping?)</li> </ul> </li> <li>- Can you describe any time or situation when he or she didn't want to do your training exercises? <ul style="list-style-type: none"> <li>o What were some reasons for stopping?</li> </ul> </li> <li>- Who would you speak to if you were having trouble with following the rehab training and tasks for your family member? <ul style="list-style-type: none"> <li>o When have you had to do this?</li> </ul> </li> <li>- Did the discharge planning in the hospital help? In what way?</li> </ul> |
|                                                                       | <p>Relationships</p>                                                                                                                                                                                                                | <p>How would you describe your relationship with your health providers (stroke coordinators, doctors, nurses, physiotherapists?)</p> <p>With your family member post stroke as compared to before the stroke? (could be sensitive)</p>                                                                                                                                                                                                                                                                                                                                                                                                                                                                                                                                                                                                                                                                                                                                                                                                                                                   |
| <p><b>Translation to current practice</b></p>                         | <p>Would you recommend this intervention to others?</p>                                                                                                                                                                             | <ul style="list-style-type: none"> <li>- Has the cost of care been an issue for your family? If the intervention package required a fee, would you pay for it? Have other costs, e.g. cost of attending GP, travel to the health service, other specialist services, etc. been an issue?</li> <li>- Now that the study is over, would you think the intervention helped in your family members' recovery or would your family have managed anyway? (intervention arm)</li> <li>- What other things would have helped you in your recovery and what more supports would you like in an ideal situation?</li> </ul>                                                                                                                                                                                                                                                                                                                                                                                                                                                                        |

|                                             |                                                              |                                                                                                                                                                                                                                                                                                                                                                                                                                                                                                                                                                                                                                                                                                                                                                                                                                                                                                                                                                                                                                                                                                                                                                         |
|---------------------------------------------|--------------------------------------------------------------|-------------------------------------------------------------------------------------------------------------------------------------------------------------------------------------------------------------------------------------------------------------------------------------------------------------------------------------------------------------------------------------------------------------------------------------------------------------------------------------------------------------------------------------------------------------------------------------------------------------------------------------------------------------------------------------------------------------------------------------------------------------------------------------------------------------------------------------------------------------------------------------------------------------------------------------------------------------------------------------------------------------------------------------------------------------------------------------------------------------------------------------------------------------------------|
| <p><b>General views about the trial</b></p> | <p>What are your thoughts about ATTEND trial in general?</p> | <ul style="list-style-type: none"> <li>• How have you found being involved in the study? <ul style="list-style-type: none"> <li>○ What things did/didn't you like about being involved?</li> </ul> </li> <li>• Tell me how you think the study worked, and what it was hoping to achieve?</li> <li>• What were the things that made you want to participate in the study initially? <ul style="list-style-type: none"> <li>○ What were the benefits to you of participating?</li> </ul> </li> <li>• What concerns did you have about participating in this study? <ul style="list-style-type: none"> <li>○ Were there any things that may have stopped you from participating initially?</li> <li>○ What were the risks of participating in the study?</li> </ul> </li> <li>• Once you and your family member were enrolled, what would have changed your mind about being in the study? <ul style="list-style-type: none"> <li>○ Did you feel that you could withdraw at any time?</li> </ul> </li> <li>• Did you know who to contact if you had any concerns about the trial?</li> <li>• What were your thoughts about your privacy throughout this study?</li> </ul> |
| <p><b>Concluding questions</b></p>          |                                                              | <ul style="list-style-type: none"> <li>• Are there things which we can do better to improve the study or the running of the trial?</li> <li>• Is there something else that you would like to say, that we have not talked about in this interview?</li> </ul>                                                                                                                                                                                                                                                                                                                                                                                                                                                                                                                                                                                                                                                                                                                                                                                                                                                                                                           |
