# Supplementary material for: Protocol for process evaluation of a randomised controlled trial of family-led rehabilitation post stroke (ATTEND) in India
Source: PubMed Central journal article supplement — BMJ Open. 2016 Sep 15;6(9):e012027. doi: 10.1136/bmjopen-2016-012027 (PMC5030603; doi:10.1136/bmjopen-2016-012027), 2016-09-15
Supplement: bmjopen-2016-012027supp4.pdf [file bmjopen-2016-012027supp4.pdf]

**Additional File 4: The ATTEND Study- Patient interview guide**

**Purpose of the interview:** *Capture what it is like for people to manage post stroke. How to manage their disability, how the burden could be made easier/better/worse. How the intervention package might influence this (or not); or how the trial might influence this (or not).*

| Area of Interest                                            | Initial Broad Descriptive Questions                                         | Possible Probing Questions<br>(These are a guide only. Depending on what the patient tells you, you do not have to ask all these questions or use the words exactly as written.)                                                                                                                                                                                                                                                                                                                                          |
|-------------------------------------------------------------|-----------------------------------------------------------------------------|---------------------------------------------------------------------------------------------------------------------------------------------------------------------------------------------------------------------------------------------------------------------------------------------------------------------------------------------------------------------------------------------------------------------------------------------------------------------------------------------------------------------------|
| <b>Health care experience</b>                               | Can you tell me about your stroke?<br><br>How was the care in the hospital? | <ul style="list-style-type: none"><li>- What are some of the good/bad things about your health care?</li><li>- What type of support do you get from family, community or social groups with looking after your health?<ul style="list-style-type: none"><li>o What kind of roles/responsibilities do you have in your family?</li></ul></li></ul>                                                                                                                                                                         |
| <b>Satisfaction/ problems with the intervention package</b> | What are your thoughts about your current treatment for your stroke?        | <ul style="list-style-type: none"><li>- What did you think of the in hospital visit, the home visits?</li><li>- What was helpful? ( eg. stroke recovery trajectory, how to identify low mood, importance of specific activities)</li><li>- What was not helpful?</li><li>- Would you be happy to recommend this type of care to someone else, if applicable.</li><li>- How can your doctor or the stroke unit improve your current treatment?</li><li>- What has been most important in helping you get better?</li></ul> |

|                                                                |                                                                                                                                                                                                                                     |                                                                                                                                                                                                                                                                                                                                                                                                                                                                                                                                                                                                                                                                                                                                                                                                                                                                                                                                                                                                                                    |
|----------------------------------------------------------------|-------------------------------------------------------------------------------------------------------------------------------------------------------------------------------------------------------------------------------------|------------------------------------------------------------------------------------------------------------------------------------------------------------------------------------------------------------------------------------------------------------------------------------------------------------------------------------------------------------------------------------------------------------------------------------------------------------------------------------------------------------------------------------------------------------------------------------------------------------------------------------------------------------------------------------------------------------------------------------------------------------------------------------------------------------------------------------------------------------------------------------------------------------------------------------------------------------------------------------------------------------------------------------|
| <b>Asking about specific components if not already covered</b> | <p>Information about stroke trajectory, risk, identification of low mood</p> <p>Goal setting</p> <p>Positioning, transfers and mobility</p> <p>Task oriented training, the use of the cultural manual</p> <p>Discharge planning</p> | <ul style="list-style-type: none"> <li>- How do you know what you know about stroke? Is it from family, SC, doctor.</li> <li>- How was it trying to achieve goals that were set? <ul style="list-style-type: none"> <li>o What are the things that helped? And what things didn't?</li> </ul> </li> <li>- When do you find it more difficult to do training and to maintain mobility etc? <ul style="list-style-type: none"> <li>o What are the things that might make you stop? (pain?, tiredness, low mood, others helping?)</li> </ul> </li> <li>- Can you describe any time or situation when you didn't want to do your training exercises? <ul style="list-style-type: none"> <li>o What things were influencing your decision?</li> </ul> </li> <li>- Who would you speak to if you were having trouble with following the rehab training and tasks? <ul style="list-style-type: none"> <li>o When have you had to do this?</li> </ul> </li> <li>- Did the discharge planning in the hospital help? In what way?</li> </ul> |
|                                                                | <p>Relationships</p>                                                                                                                                                                                                                | <p>How would you describe your relationship with the SC?</p> <p>With your nominated carer? (could be sensitive)</p>                                                                                                                                                                                                                                                                                                                                                                                                                                                                                                                                                                                                                                                                                                                                                                                                                                                                                                                |
| <b>Translation to current practice</b>                         | <p>Would you recommend this intervention to others?</p>                                                                                                                                                                             | <ul style="list-style-type: none"> <li>- Has the cost of care been an issue for you? If the intervention package required a fee, would you pay for it? Have other costs, e.g. cost of attending GP, travel to the health service, other specialist services, etc. been an issue?</li> <li>- Now that the study is over, would you think the intervention helped in your recovery or would you have managed anyway?</li> <li>- What other things would have helped you in your recovery and what more supports would you like in an ideal situation?</li> </ul>                                                                                                                                                                                                                                                                                                                                                                                                                                                                     |

|                                      |                                                       |                                                                                                                                                                                                                                                                                                                                                                                                                                                                                                                                                                                                                                                                                                                                                                                                                                                                                                                                                                                                                                                                                                                                                                                                  |
|--------------------------------------|-------------------------------------------------------|--------------------------------------------------------------------------------------------------------------------------------------------------------------------------------------------------------------------------------------------------------------------------------------------------------------------------------------------------------------------------------------------------------------------------------------------------------------------------------------------------------------------------------------------------------------------------------------------------------------------------------------------------------------------------------------------------------------------------------------------------------------------------------------------------------------------------------------------------------------------------------------------------------------------------------------------------------------------------------------------------------------------------------------------------------------------------------------------------------------------------------------------------------------------------------------------------|
| <b>General views about the trial</b> | What are your thoughts about ATTEND trial in general? | <ul style="list-style-type: none"> <li>• How have you found being involved in the study?             <ul style="list-style-type: none"> <li>○ What things did/didn't you like about being involved?</li> </ul> </li> <li>• Tell me how you think the study worked, and what it was hoping to achieve?</li> <li>• What were the things that made you want to participate in the study initially?             <ul style="list-style-type: none"> <li>○ What were the benefits to you of participating?</li> </ul> </li> <li>• What concerns did you have about participating in this study?             <ul style="list-style-type: none"> <li>○ Were there any things that may have stopped you from participating initially?</li> <li>○ What were the risks of participating in the study?</li> </ul> </li> <li>• Once you were enrolled, what would have changed your mind about being in the study?             <ul style="list-style-type: none"> <li>○ Did you feel that you could withdraw at any time?</li> </ul> </li> <li>• Did you know who to contact if you had any concerns about the trial?</li> <li>• What were your thoughts about your privacy throughout this study?</li> </ul> |
| <b>Concluding questions</b>          |                                                       | <ul style="list-style-type: none"> <li>• Are there things which we can do better to improve the study or the running of the trial?</li> <li>• Is there something else that you would like to say, that we have not talked about in this interview?</li> </ul>                                                                                                                                                                                                                                                                                                                                                                                                                                                                                                                                                                                                                                                                                                                                                                                                                                                                                                                                    |
